# Supplementary material for: miR-10a rejuvenates aged human mesenchymal stem cells and improves heart function after myocardial infarction through KLF4
Source: PubMed Central journal article supplement (PMC5977543; doi:10.1186/s13287-018-0895-0), 2018-05-30

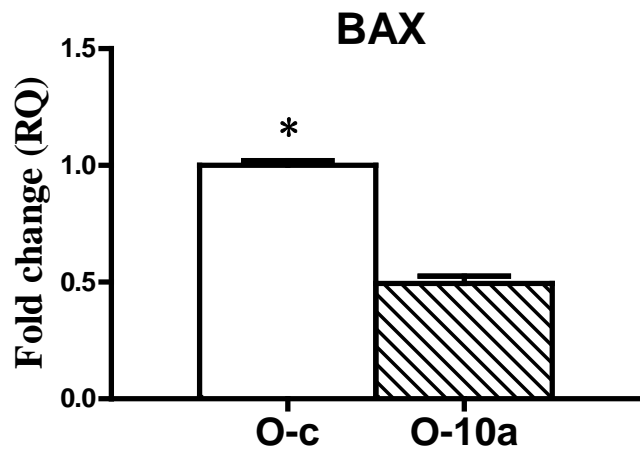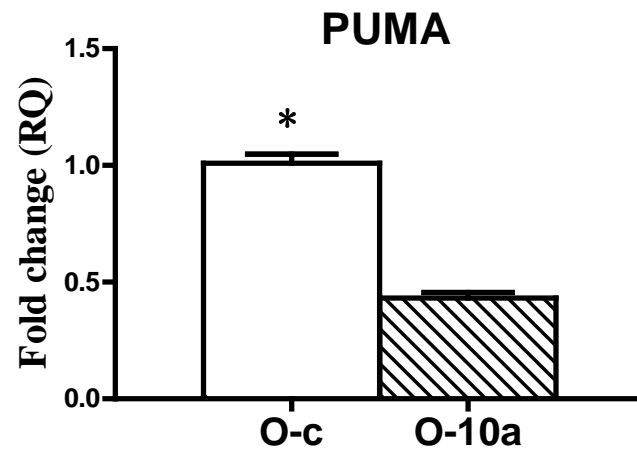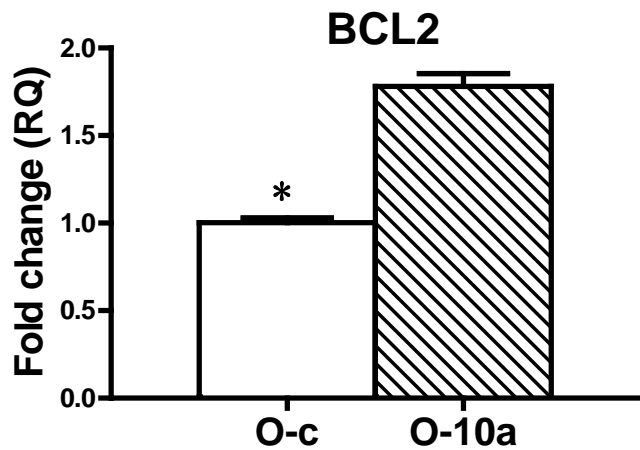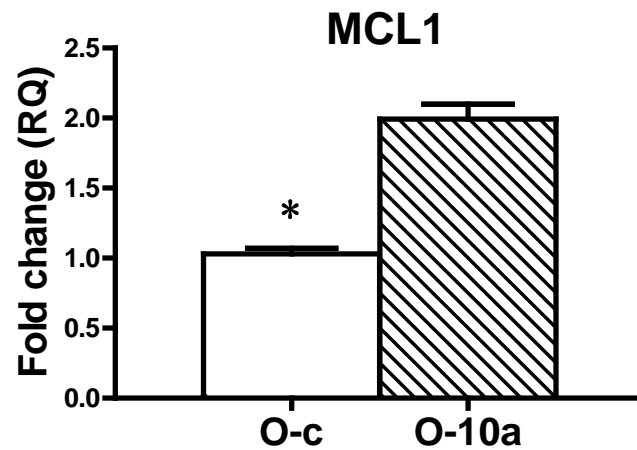

Supplement: 13287_2018_895_MOESM4_ESM.pdf [file 13287_2018_895_MOESM4_ESM.pdf]
